# Supplementary material for: Therapeutic targeting of measles virus polymerase with ERDRP-0519 suppresses all RNA synthesis activity
Source: PubMed Central journal article supplement (PMC7935272; doi:10.1371/journal.ppat.1009371), 2021-02-23

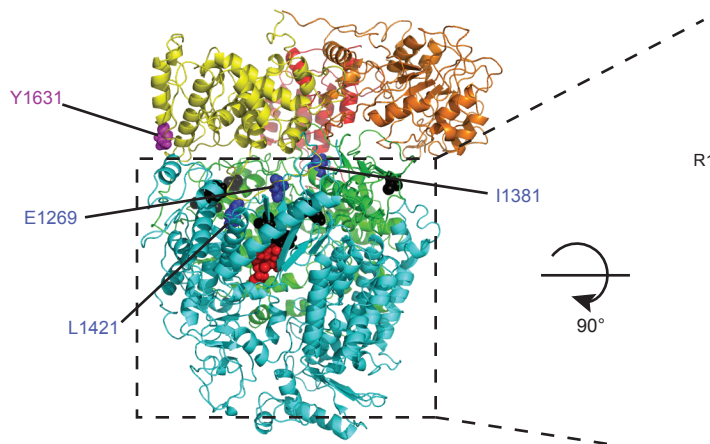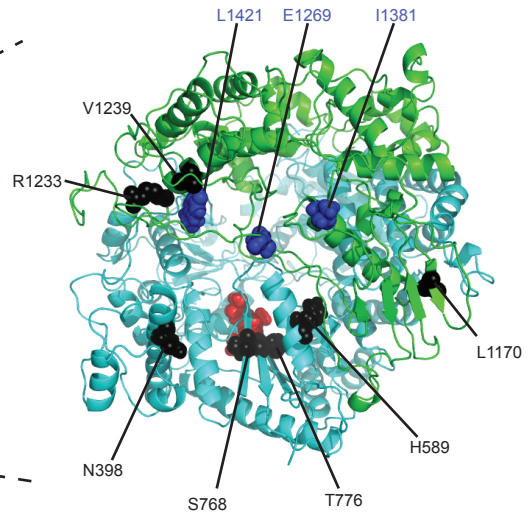

Supplement: ppat.1009371.s002.pdf [file ppat.1009371.s002.pdf]
