# Supplementary material for: Therapeutic targeting of measles virus polymerase with ERDRP-0519 suppresses all RNA synthesis activity
Source: PubMed Central journal article supplement (PMC7935272; doi:10.1371/journal.ppat.1009371), 2021-02-23
Supplement: ppat.1009371.s004.pdf [file ppat.1009371.s004.pdf]

A

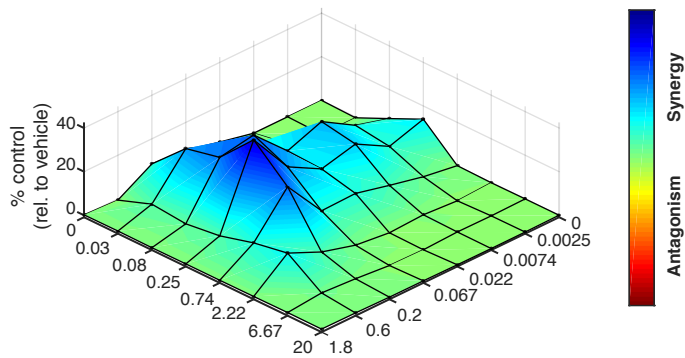

B

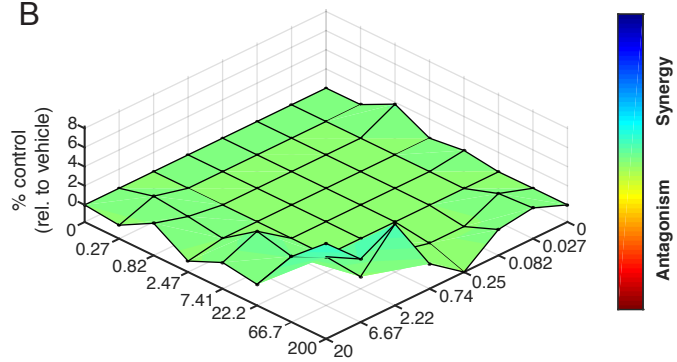

C

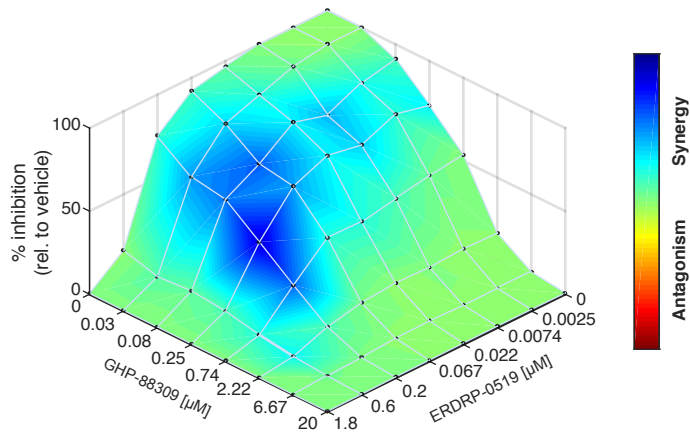

D

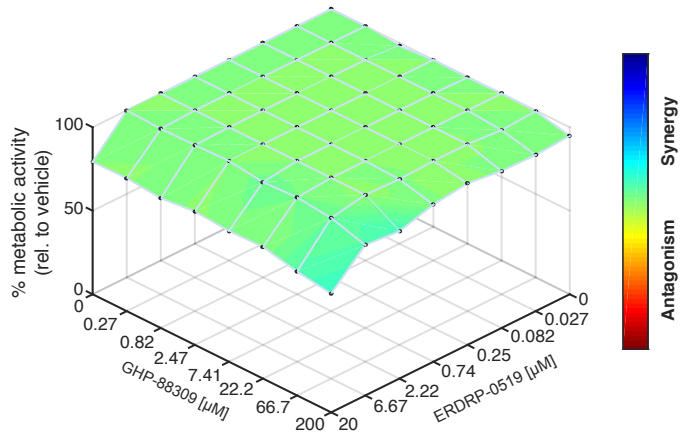

E

|                       |        | GHP-88309 [ $\mu$ M] |                            |                  |                 |                  |                |           |
|-----------------------|--------|----------------------|----------------------------|------------------|-----------------|------------------|----------------|-----------|
|                       |        | 0.03                 | 0.08                       | 0.25             | 0.74            | 2.22             | 6.67           | 20        |
| ERDRP-0519 [ $\mu$ M] | 0.0025 | 0<br>+/-0<br>***     | 11<br>+/-17                | 9<br>+/-25       | 3<br>+/-20      | -1<br>+/-5       | 0<br>+/-1      | 0<br>+/-1 |
|                       | 0.0074 | 3<br>+/-6            | 20<br>+/-17                | 18<br>+/-21      | 6<br>+/-22      | 0<br>+/-5        | 0<br>+/-2      | 0<br>+/-1 |
|                       | 0.022  | 10<br>+/-8           | 14<br>+/-17                | 14<br>+/-17      | 10<br>+/-12     | -1<br>+/-6       | -1<br>+/-2     | 0<br>+/-1 |
|                       | 0.067  | 17<br>+/-18          | 29<br>+/-22                | 22<br>+/-18      | 10<br>+/-20     | 1<br>+/-6        | 0<br>+/-2      | 0<br>+/-1 |
|                       | 0.2    | 23<br>+/-19          | 27<br>+/-14<br>*           | 42<br>+/-11<br>* | 28<br>+/-9<br>* | 6<br>+/-1<br>*   | 1<br>+/-0<br>* | 0<br>+/-1 |
|                       | 0.6    | 5<br>+/-4            | 4<br>+/-5                  | 6<br>+/-4        | 10<br>+/-2<br>* | 13<br>+/-1<br>** | 2<br>+/-1<br>* | 0<br>+/-1 |
|                       | 1.8    | 0<br>+/-0            | 0<br>+/-0                  | 0<br>+/-1        | 0<br>+/-1       | 0<br>+/-0        | 1<br>+/-0      | 0<br>+/-1 |
|                       |        |                      | HSA synergy and antagonism |                  |                 |                  |                |           |

F

|                       |       | GHP-88309 [ $\mu$ M] |                            |                  |                  |                  |            |                |
|-----------------------|-------|----------------------|----------------------------|------------------|------------------|------------------|------------|----------------|
|                       |       | 0.27                 | 0.82                       | 2.47             | 7.41             | 22.2             | 66.7       | 200            |
| ERDRP-0519 [ $\mu$ M] | 0.027 | 0<br>+/-0<br>***     | 0<br>+/-0<br>***           | 0<br>+/-0<br>*** | 0<br>+/-0<br>*** | 0<br>+/-0<br>*** | 1<br>+/-3  | 1<br>+/-5      |
|                       | 0.082 | 0<br>+/-0<br>***     | 0<br>+/-0<br>***           | 0<br>+/-0<br>*** | 0<br>+/-0<br>*** | 0<br>+/-0<br>*** | -1<br>+/-0 | 1<br>+/-6      |
|                       | 0.25  | 0<br>+/-0<br>***     | 0<br>+/-0<br>***           | 0<br>+/-0<br>*** | 0<br>+/-0<br>*** | 0<br>+/-0<br>*** | -1<br>+/-0 | -2<br>+/-2     |
|                       | 0.74  | 0<br>+/-0<br>***     | 0<br>+/-0<br>***           | 0<br>+/-0<br>*** | 0<br>+/-0<br>*** | 0<br>+/-0<br>*** | 0<br>+/-2  | 1<br>+/-5      |
|                       | 2.22  | 0<br>+/-0<br>***     | 0<br>+/-0<br>***           | 0<br>+/-0<br>*** | 0<br>+/-0<br>*** | 0<br>+/-0<br>*** | -1<br>+/-0 | 7<br>+/-17     |
|                       | 6.67  | 1<br>+/-2            | 1<br>+/-1                  | 0<br>+/-0<br>*** | 2<br>+/-4        | 2<br>+/-3        | 3<br>+/-6  | 5<br>+/-6      |
|                       | 20    | 0<br>+/-8            | 2<br>+/-5                  | -1<br>+/-11      | 1<br>+/-6        | 0<br>+/-8        | 5<br>+/-8  | 8<br>+/-5<br>* |
|                       |       |                      | HSA synergy and antagonism |                  |                  |                  |            |                |
