# Supplementary material for: Therapeutic targeting of measles virus polymerase with ERDRP-0519 suppresses all RNA synthesis activity
Source: PubMed Central journal article supplement (PMC7935272; doi:10.1371/journal.ppat.1009371), 2021-02-23

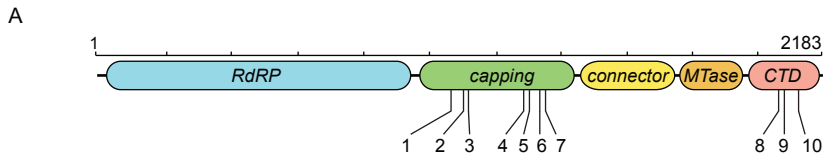

**B**

| binding region | residues  | morbillivirus consensus sequence |
|----------------|-----------|----------------------------------|
| 1              | 1050-1065 |                                  |
| 2              | 1131-1143 |                                  |
| 3              | 1152-1161 |                                  |
| 4              | 1239-1256 |                                  |
| 5              | 1284-1290 |                                  |
| 6              | 1324-1332 |                                  |
| 7              | 1368-1381 |                                  |
| 8              | 2066-2079 |                                  |
| 9              | 2084-2094 |                                  |
| 10             | 2156-2164 |                                  |

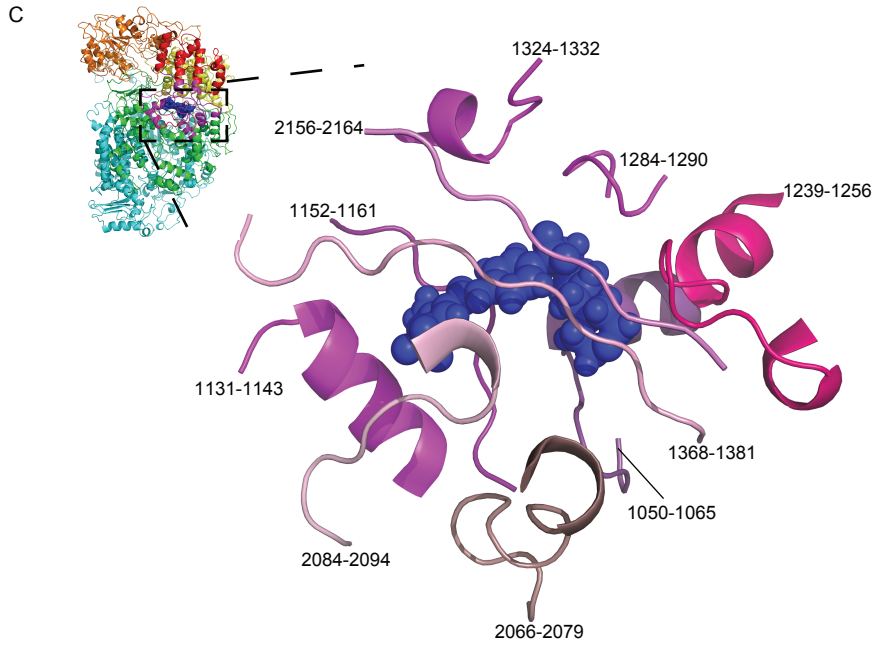

Supplement: ppat.1009371.s012.pdf [file ppat.1009371.s012.pdf]
