# Supplementary material for: Therapeutic targeting of measles virus polymerase with ERDRP-0519 suppresses all RNA synthesis activity
Source: PubMed Central journal article supplement (PMC7935272; doi:10.1371/journal.ppat.1009371), 2021-02-23
Supplement: ppat.1009371.s013.pdf [file ppat.1009371.s013.pdf]

A

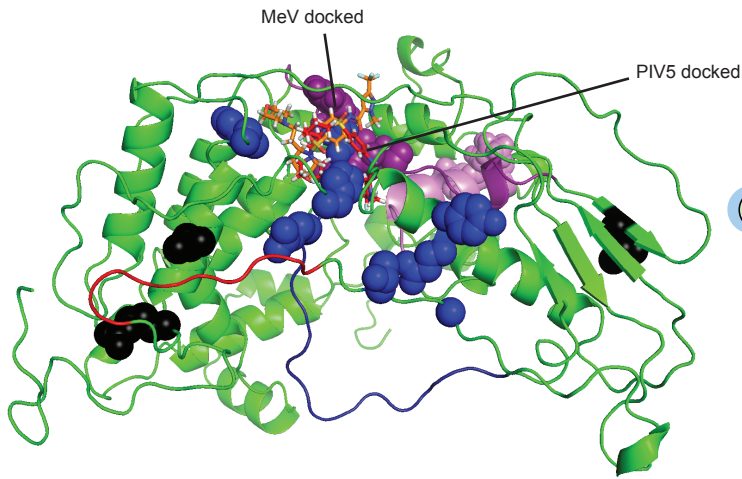

B

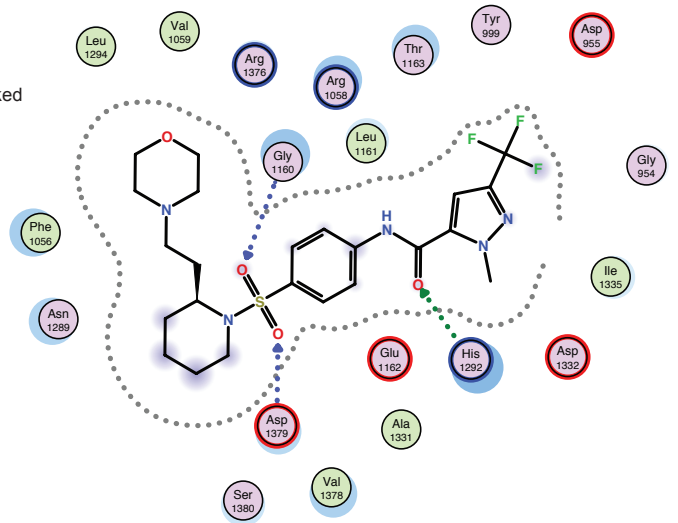

C

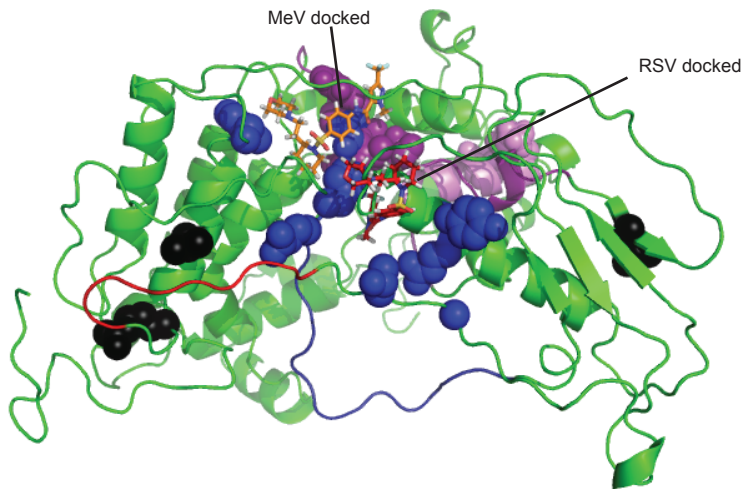

D

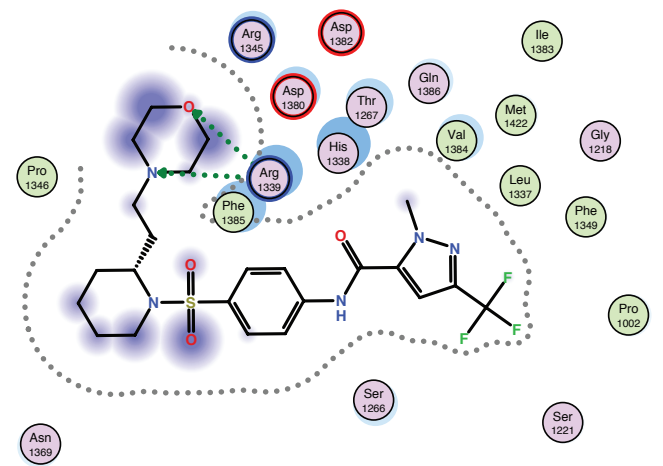

E

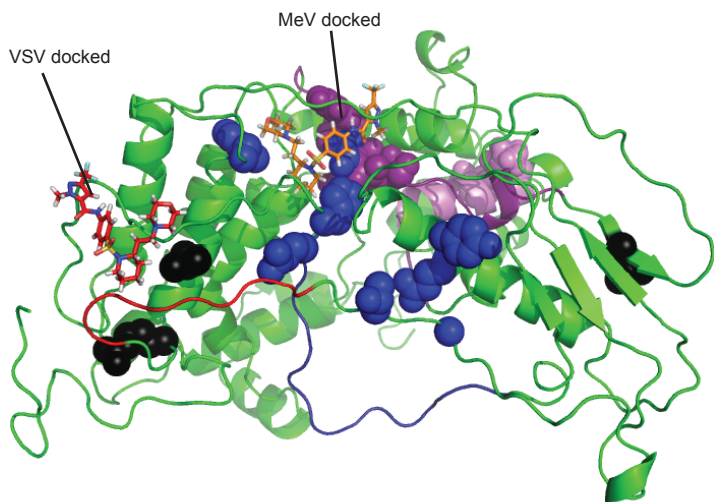

F

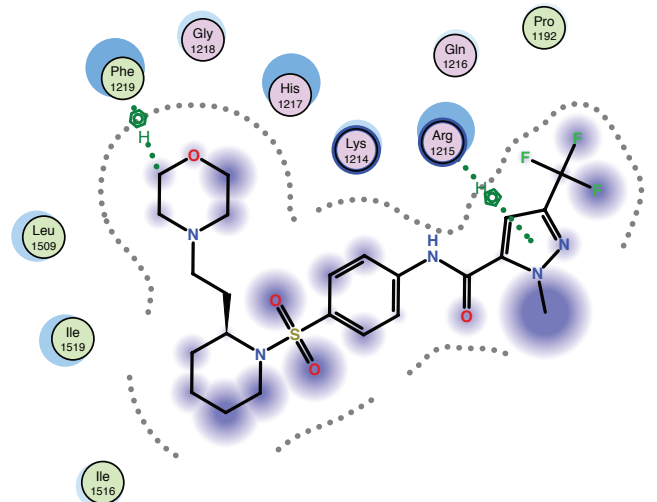

|          |                      |                     |                     |
|----------|----------------------|---------------------|---------------------|
| ○ polar  | → sidechain acceptor | ○ receptor exposure | ⋯ proximity contour |
| ● acidic | ← sidechain donor    | ○ arene-arene       | ● ligand exposure   |
| ● basic  | → backbone acceptor  | ⊕ arene-H           |                     |
| ● greasy | ← backbone donor     |                     |                     |
