# Supplementary material for: Therapeutic targeting of measles virus polymerase with ERDRP-0519 suppresses all RNA synthesis activity
Source: PubMed Central journal article supplement (PMC7935272; doi:10.1371/journal.ppat.1009371), 2021-02-23

precursor compound 1

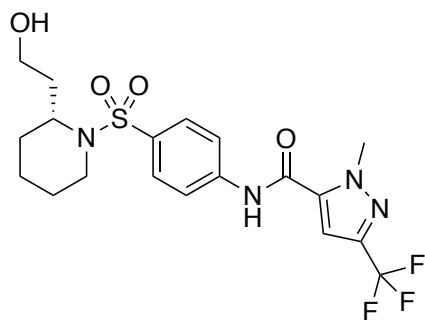

NaH  
1-azido-4-(bromomethyl)benzene  
DMF  
0°C-RT, 5 h

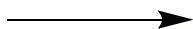

ERDRP-0519<sub>az</sub>

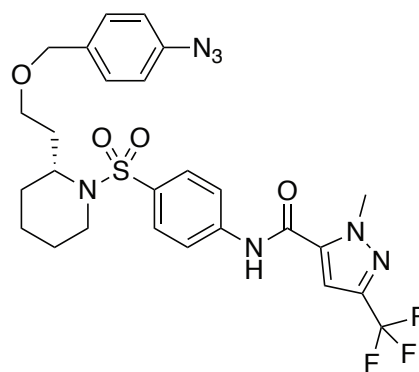

Supplement: ppat.1009371.s015.pdf [file ppat.1009371.s015.pdf]
