# Supplementary material for: Therapeutic targeting of measles virus polymerase with ERDRP-0519 suppresses all RNA synthesis activity
Source: PubMed Central journal article supplement (PMC7935272; doi:10.1371/journal.ppat.1009371), 2021-02-23

**S1 Dataset.** Source and biological repeats from figure 2A.

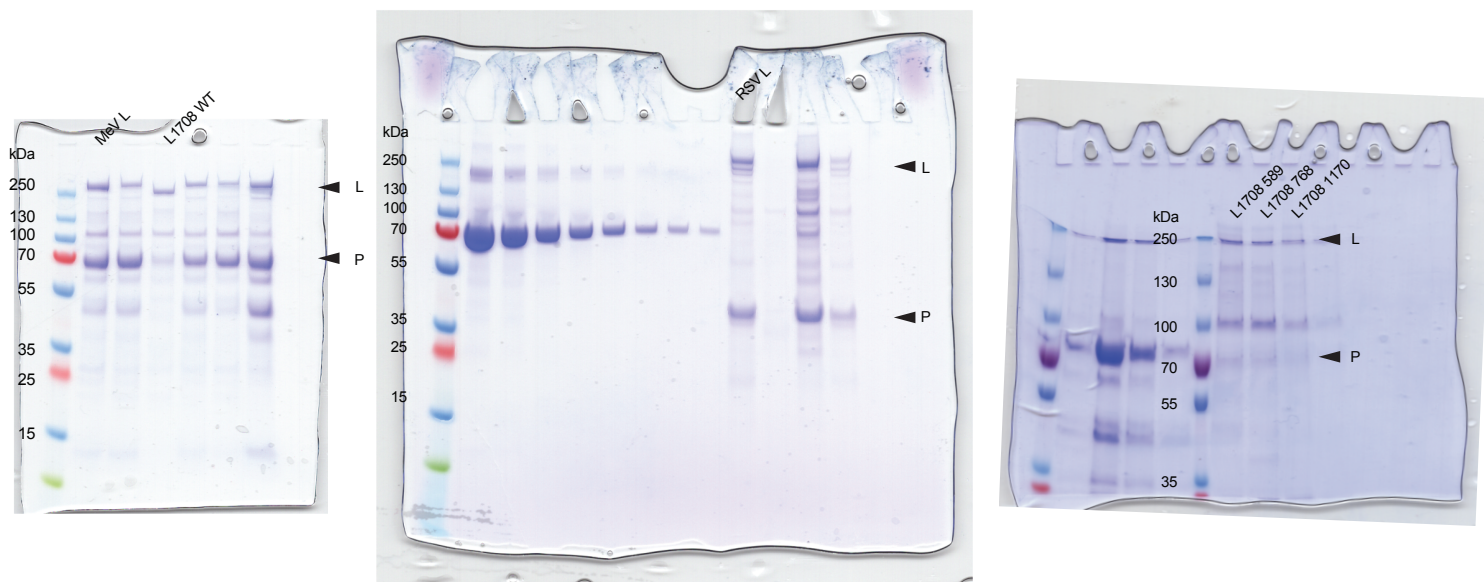

Supplement: ppat.1009371.s018.pdf [file ppat.1009371.s018.pdf]
