# Supplementary material for: Therapeutic targeting of measles virus polymerase with ERDRP-0519 suppresses all RNA synthesis activity
Source: PubMed Central journal article supplement (PMC7935272; doi:10.1371/journal.ppat.1009371), 2021-02-23

### S3 Dataset. Source and biological repeats from figure 3C.

Autoradiogram of *de novo* RdRP assay with MeV L H589Y after fractionation through Urea-PAGE

template:

3' UGUCUUUUUUUGUUUC +<sup>32P</sup>A+G+U+C

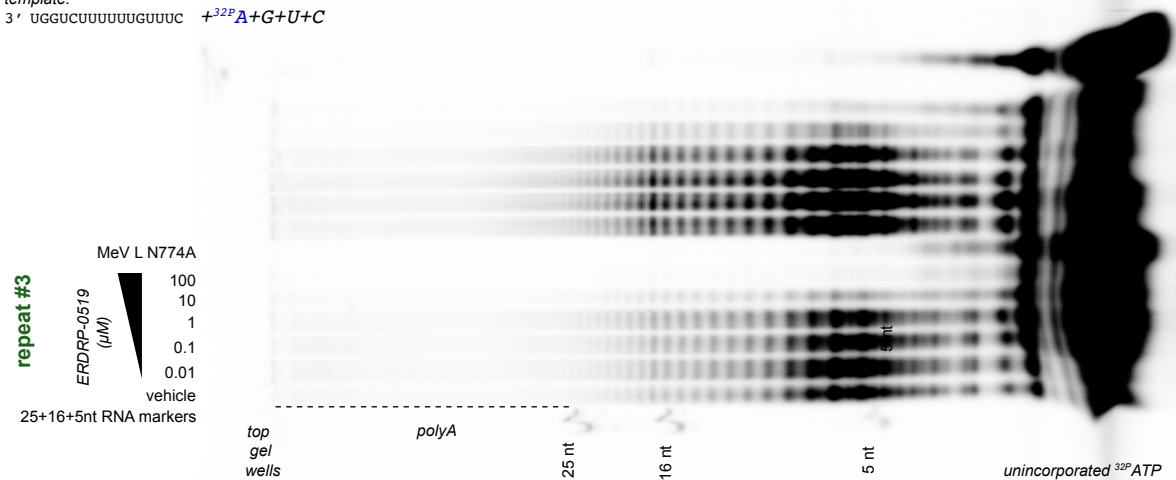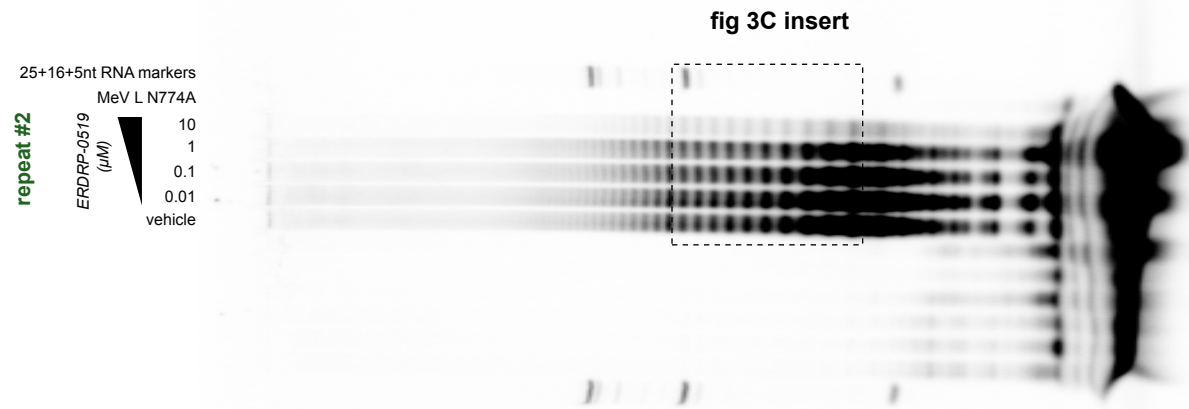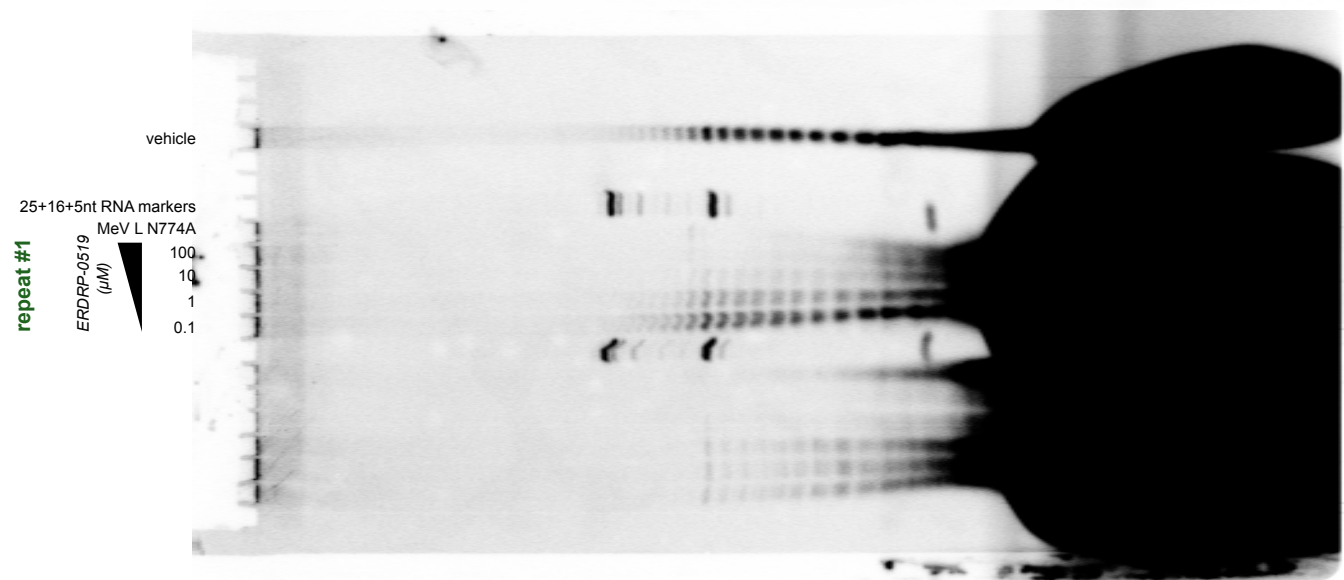

### S3 Dataset. Source and biological repeats from figure 3C.

Autoradiogram of *de novo* RdRP assay with MeV L T776A after fractionation through Urea-PAGE

template:

3' UGGUCUUUUUUUUUUU +<sup>32P</sup>A+G+U+C

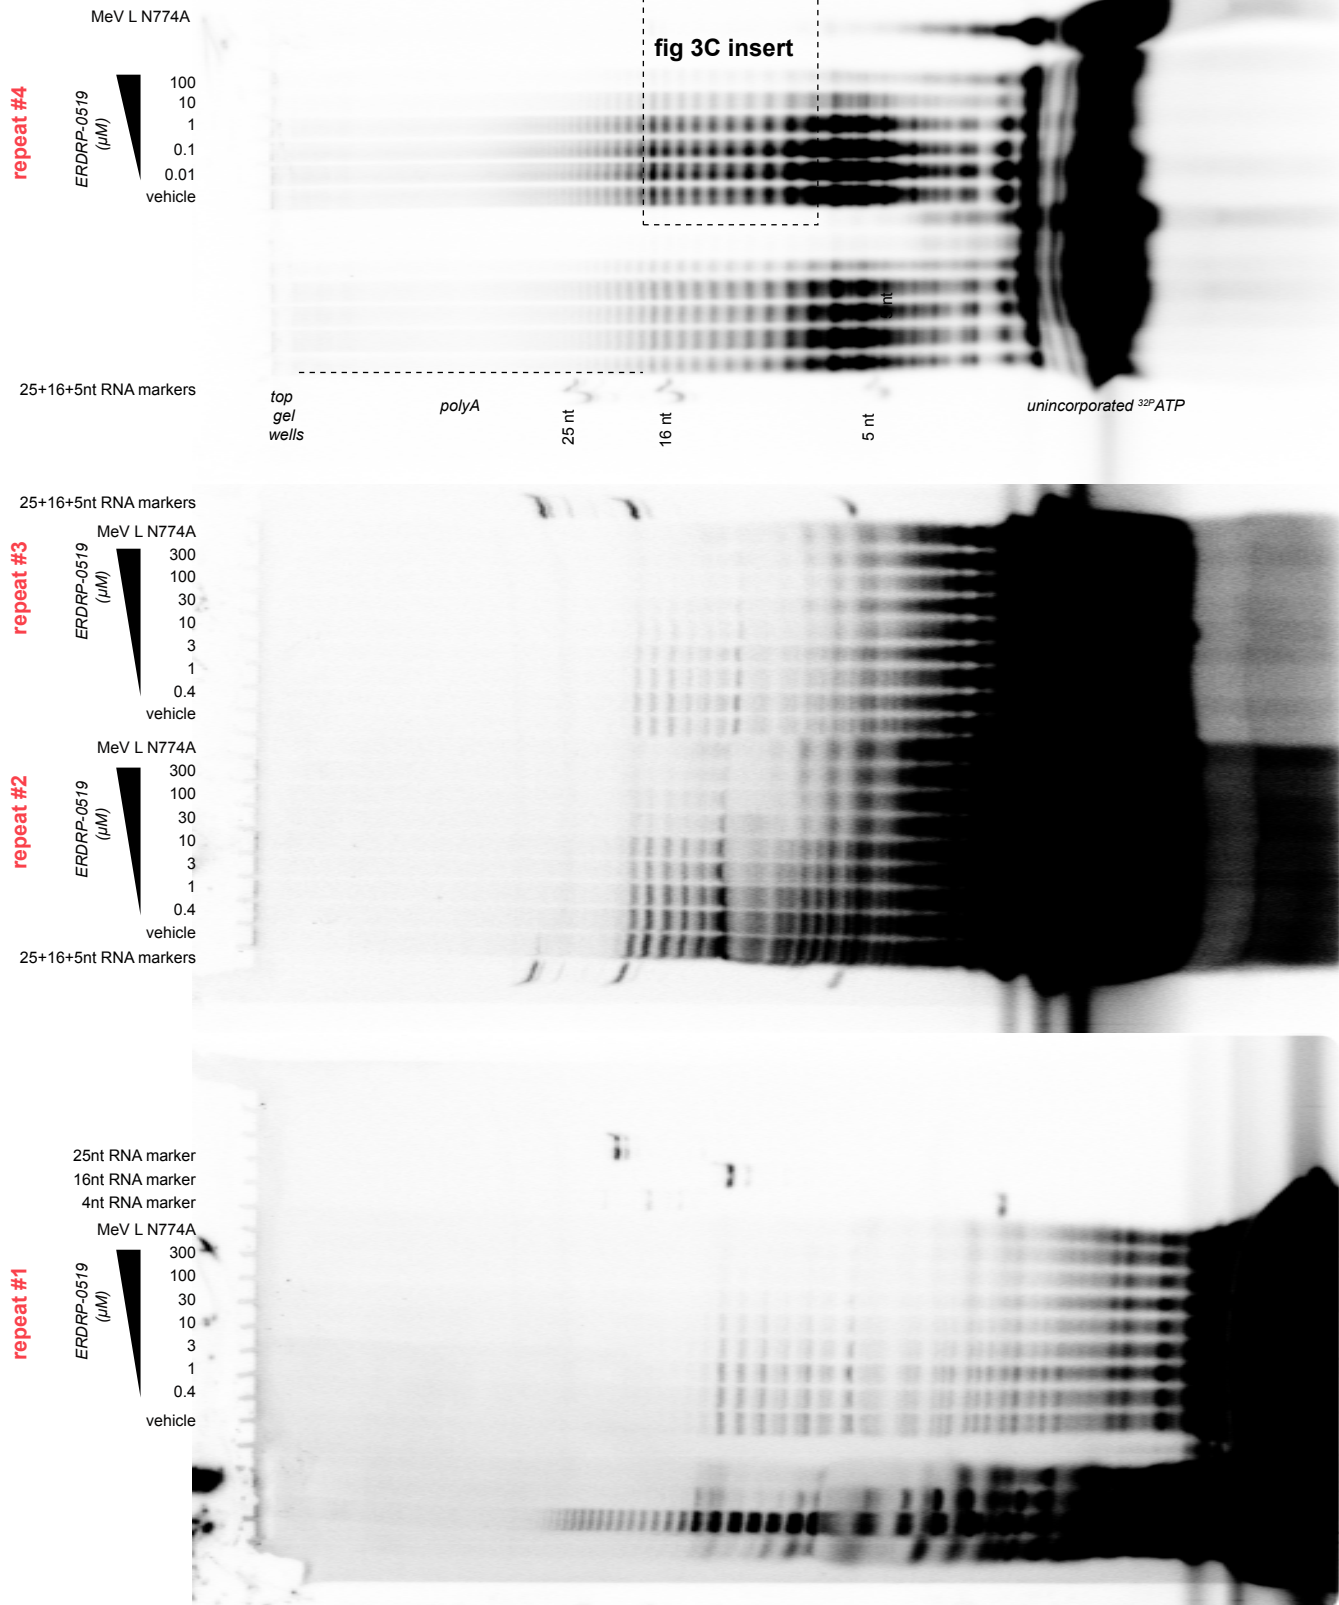

### S3 Dataset. Source and biological repeats from figure 3C.

Autoradiogram of *de novo* RdRP assay with **MeV L WT** after fractionation through Urea-PAGE

template:

3' UGGUCUUUUUUUUUUUUU +<sup>32P</sup>A+G+U+C

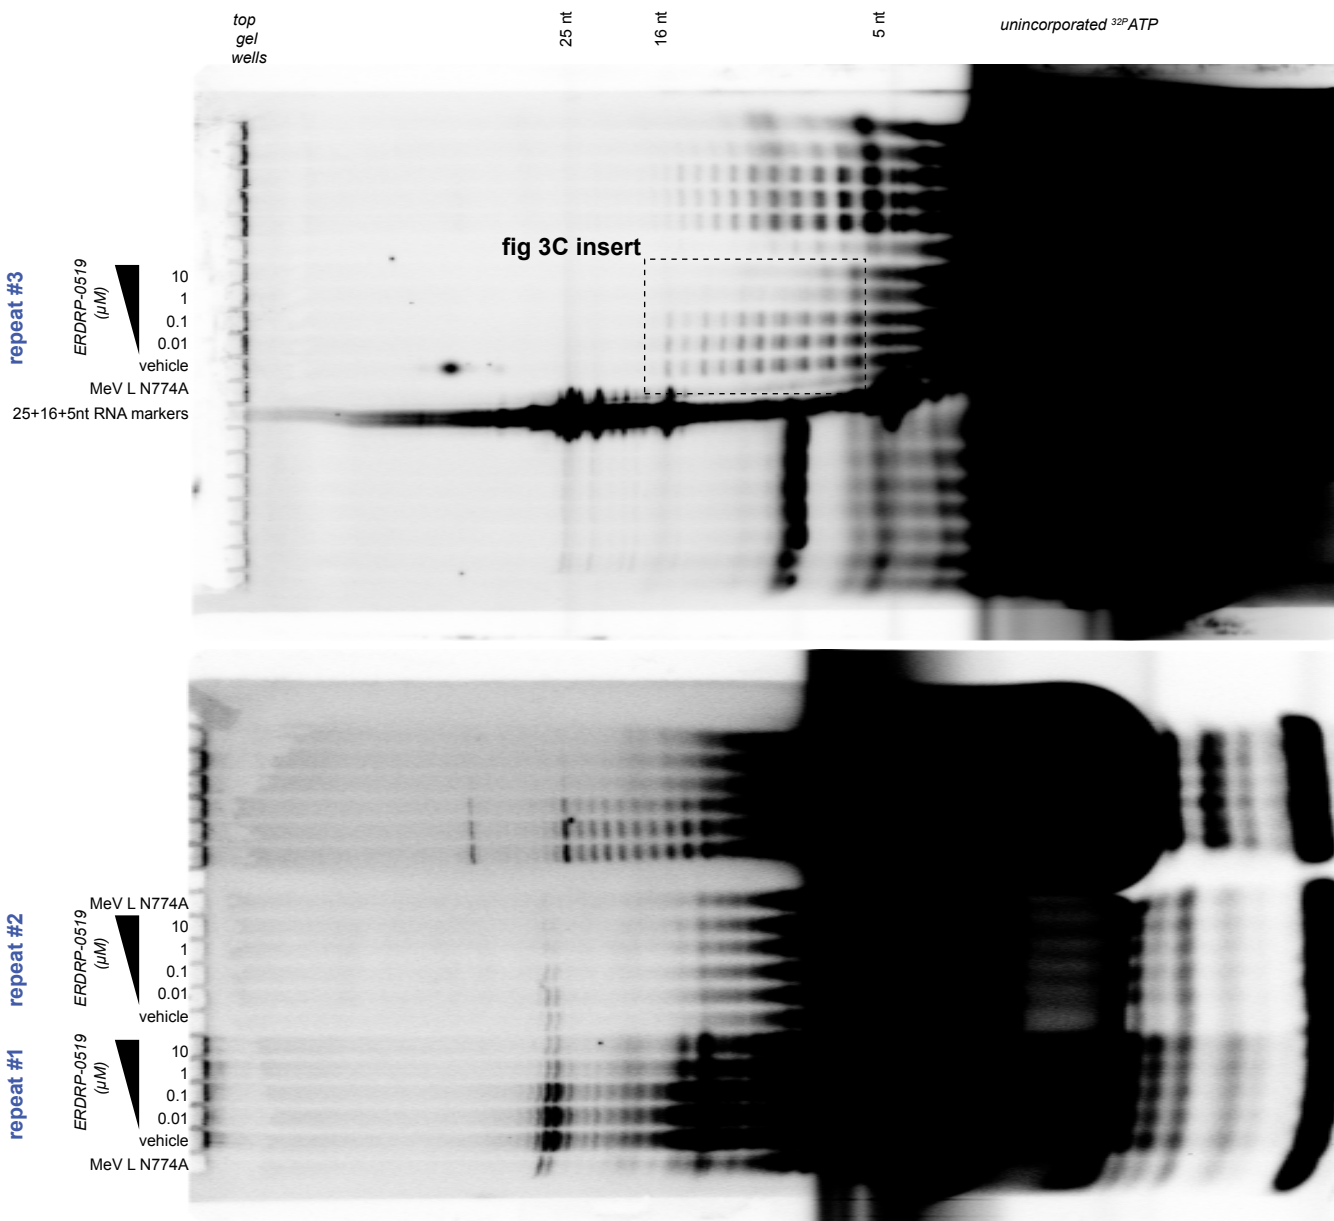

Supplement: ppat.1009371.s020.pdf [file ppat.1009371.s020.pdf]
