# Supplementary material for: Therapeutic targeting of measles virus polymerase with ERDRP-0519 suppresses all RNA synthesis activity
Source: PubMed Central journal article supplement (PMC7935272; doi:10.1371/journal.ppat.1009371), 2021-02-23

### S5 Dataset. Source and biological repeats from supporting figure S8.

Autoradiogram of *primer extension* RdRP assay with MeV L RdRP catalytic mutants after fractionation through Urea-PAGE

template: 3' UGGUCUUUUUUGUUUC  
primer: 5' ACCA  
          <sup>p</sup>          +<sup>32P</sup>G+A

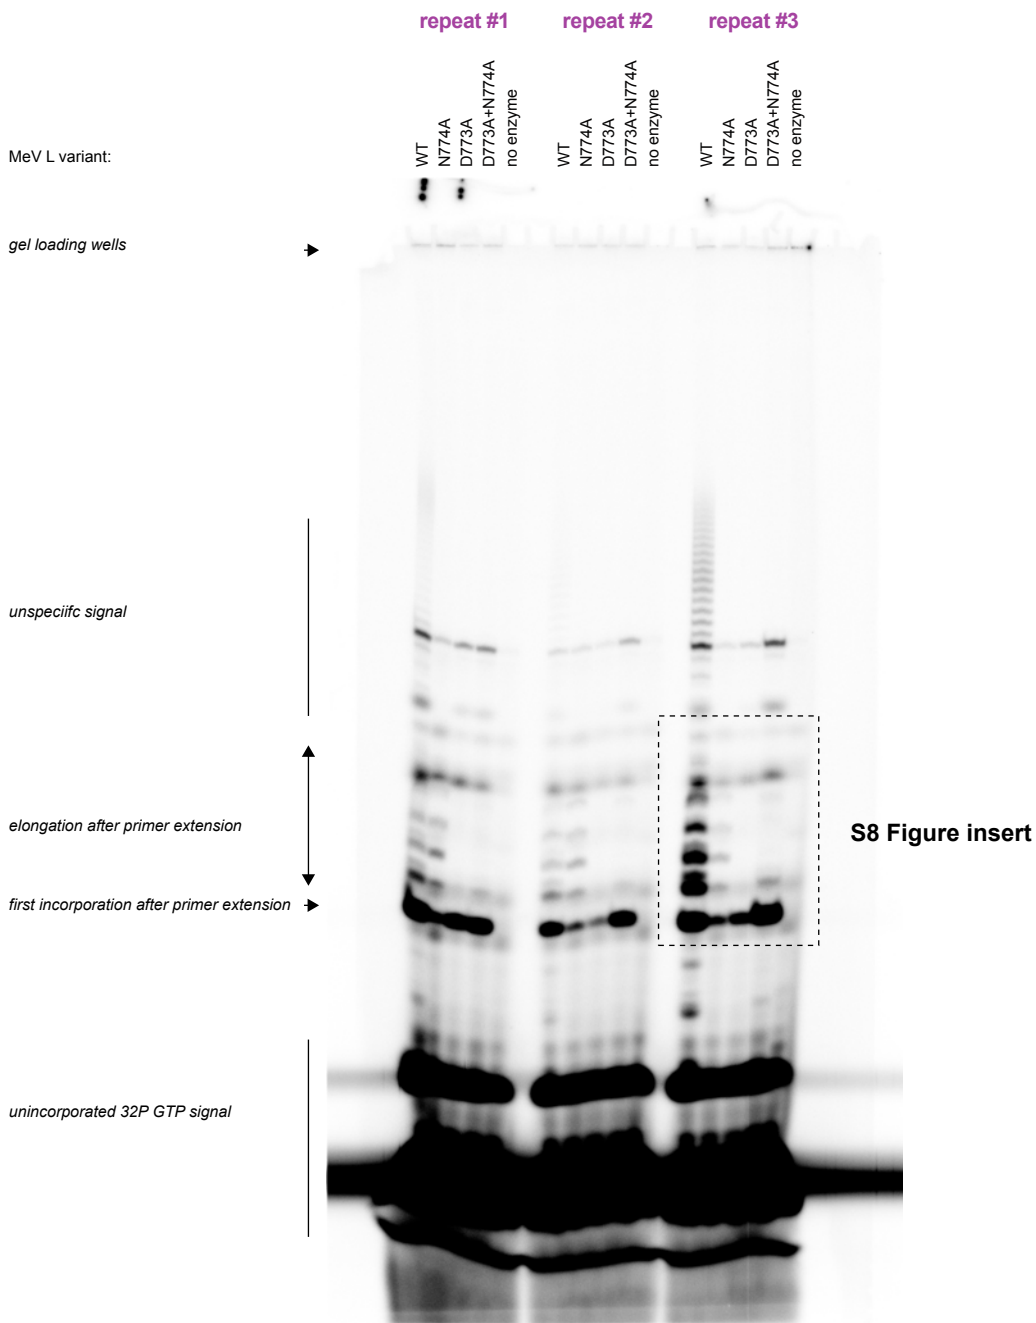

Supplement: ppat.1009371.s022.pdf [file ppat.1009371.s022.pdf]
