# Supplementary material for: Therapeutic targeting of measles virus polymerase with ERDRP-0519 suppresses all RNA synthesis activity
Source: PubMed Central journal article supplement (PMC7935272; doi:10.1371/journal.ppat.1009371), 2021-02-23

**S6 Dataset. Source and biological repeats from figure 4B-C.**  
 Autoradiogram of *de novo* RdRP assay with **MeV L WT** after fractionation through Urea-PAGE

template:  
 3' UGCUCUUUUUUUCACAGUUUUUUGAU  
 +<sup>32P</sup>G+A+U+C

repeat #3

4nt marker  
 16nt marker  
 ERDRP-0519  
 (μM)  
 0.01  
 0.1  
 1  
 10  
 vehicle  
 MeV L N774A

fig 4C insert

fig 4B insert

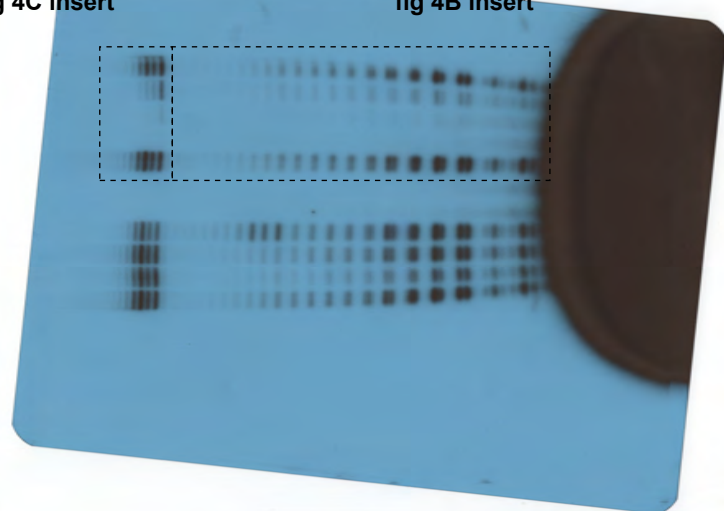

repeat #2

MeV L N774A  
 ERDRP-0519  
 (μM)  
 0.1  
 1  
 10  
 vehicle

16nt RNA marker  
 MeV L N774A

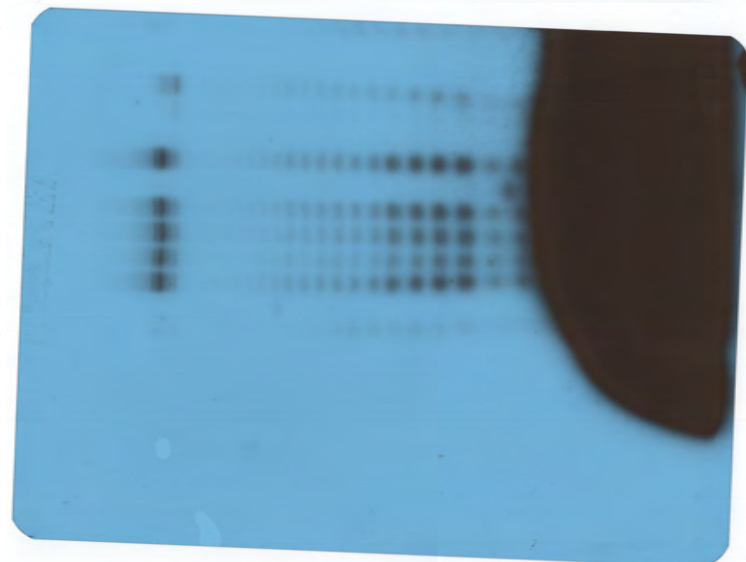

repeat #1

ERDRP-0519  
 (μM)  
 0.1  
 1  
 10  
 vehicle  
 MeV L N774A  
 16nt marker  
 4nt marker

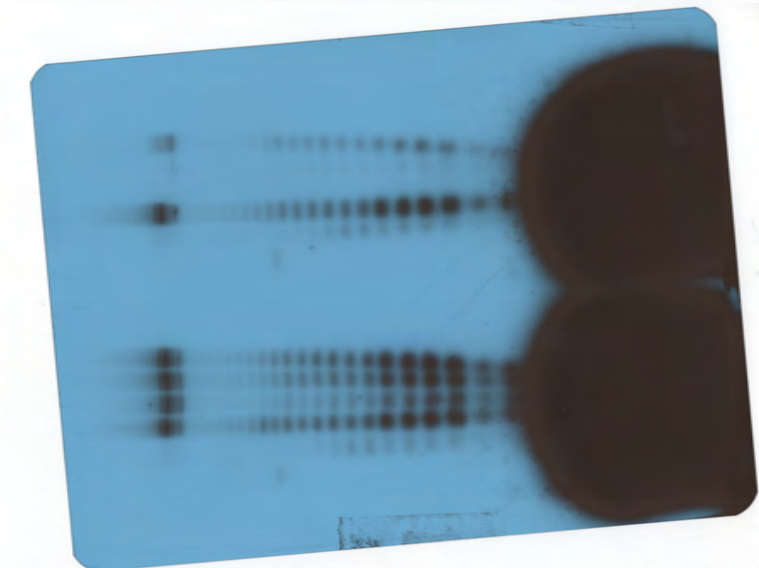

Supplement: ppat.1009371.s023.pdf [file ppat.1009371.s023.pdf]
