# Supplementary material for: Therapeutic targeting of measles virus polymerase with ERDRP-0519 suppresses all RNA synthesis activity
Source: PubMed Central journal article supplement (PMC7935272; doi:10.1371/journal.ppat.1009371), 2021-02-23

### S7 Dataset. Source and biological repeats from figure 4D.

Autoradiogram of *primer extension* RdRP assay with **MeV L WT** after fractionation through Urea-PAGE

template: 3' UGGUCUUUUUUUGUUUC

primer: 5' ACCA <sup>+32P</sup>G

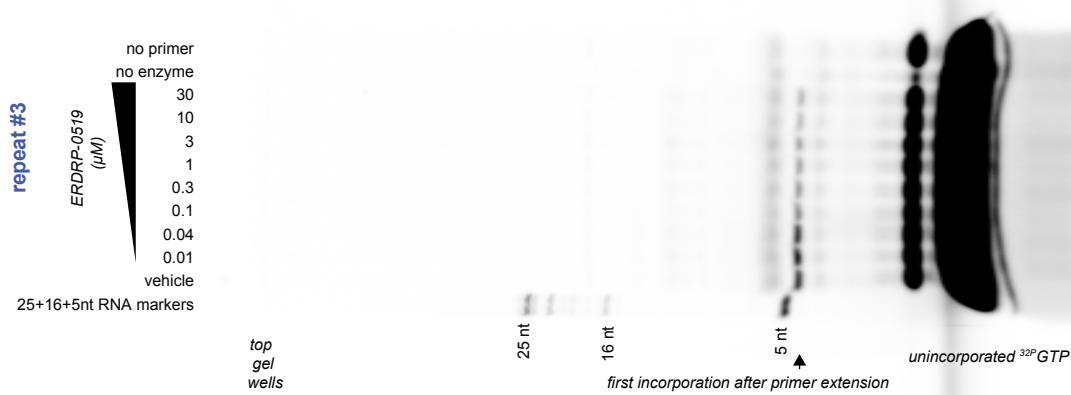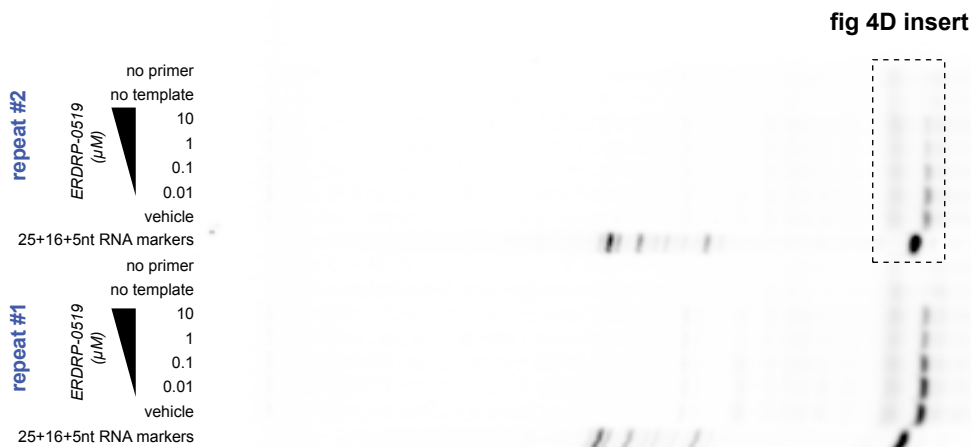

**S6 Dataset. Source and biological repeats from figure 4D.**

Autoradiogram of *primer extension* RdRP assay with **MeV L T776A** after fractionation through Urea-PAGE

template: 3' UGGUCUUUUUUUGUUUC

primer: 5' ACCA <sup>+32P</sup>G

repeat #3

no enzyme  
no primer  
no template  
ERDRP-0519 (μM)  
300  
100  
30  
10  
3  
1  
0.4  
0.1  
vehicle

top  
gel  
wells

first incorporation after primer extension

unincorporated <sup>32P</sup>GTP

repeat #2

no enzyme  
no primer  
no template  
ERDRP-0519 (μM)  
300  
100  
30  
10  
3  
1  
0.4  
0.1  
vehicle

repeat #1

ERDRP-0519 (μM)  
100  
10  
1  
0.1  
vehicle  
no enzyme  
no template  
no primer

fig 4D insert

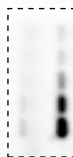

Supplement: ppat.1009371.s024.pdf [file ppat.1009371.s024.pdf]
