# Supplementary material for: Therapeutic targeting of measles virus polymerase with ERDRP-0519 suppresses all RNA synthesis activity
Source: PubMed Central journal article supplement (PMC7935272; doi:10.1371/journal.ppat.1009371), 2021-02-23

# S8 Dataset. Source and biological repeats from supporting figure S9.

Autoradiogram of *primer extension* RdRP assay with MeV L and ERDRP-0519az after fractionation through Urea-PAGE

## *de novo* RNA synthesis

3' UGGUCUUUUUUUGUUUC  
----->

+<sup>32P</sup>A+G+U+C

gel  
loading  
wells

25 nt

16 nt

Figure S9 insert

5 nt

unincorporated 32P ATP signal

repeat #2  
ERDRP-0519az  
L D773A+N774A  
L D773A  
L N774A  
100 μM  
10 μM  
vehicle  
25+16+5nt RNA markers

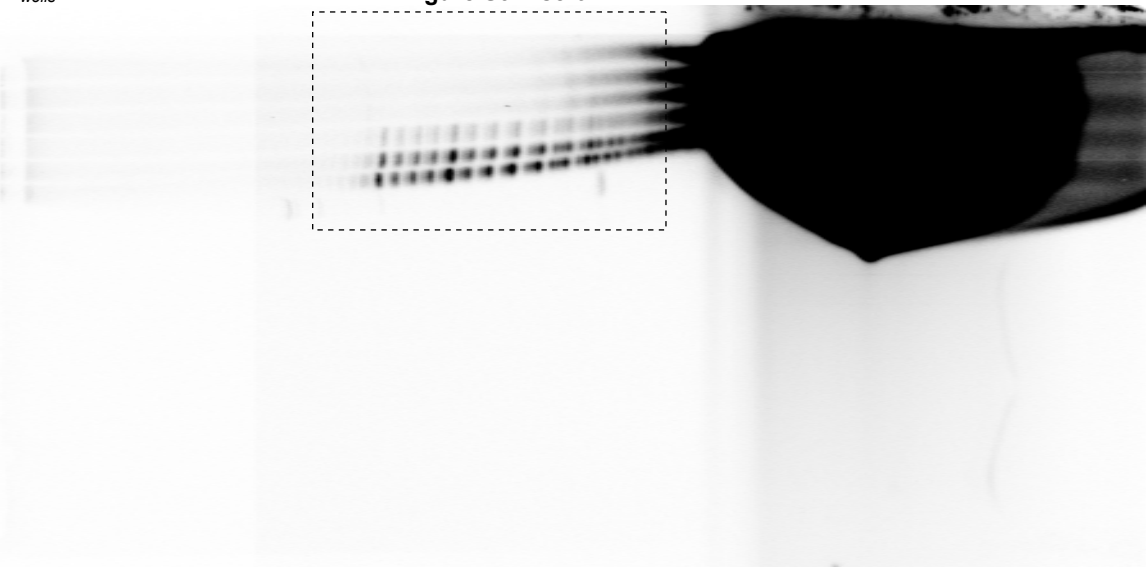

repeat #1  
ERDRP-0519az  
L D773A+N774A  
L D773A  
L N774A  
100 μM  
10 μM  
1 μM  
0.1 μM  
0.01 μM  
vehicle

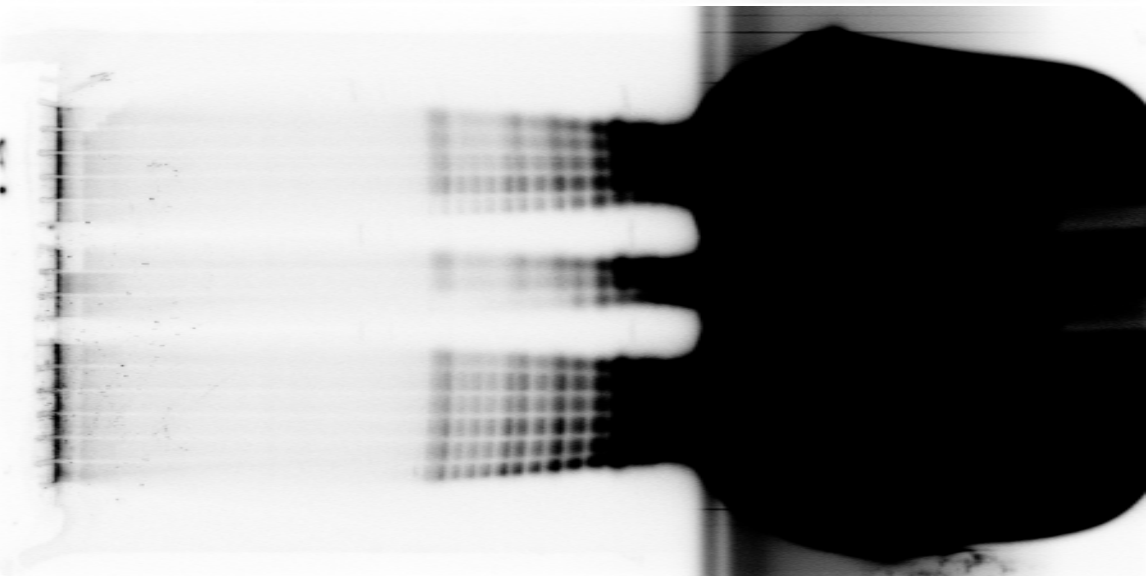

Supplement: ppat.1009371.s025.pdf [file ppat.1009371.s025.pdf]
