# Supplementary material for: Therapeutic targeting of measles virus polymerase with ERDRP-0519 suppresses all RNA synthesis activity
Source: PLoS Pathog. 2021 Feb 23;17(2):e1009371. doi: 10.1371/journal.ppat.1009371 (PMC7935272; doi:10.1371/journal.ppat.1009371)
Supplement: S14 Fig — A-I) Overlay of the ERDRP-0519 docking pose into MeV L homology models based on PIV-5 (intrusion loop down; A, D, G), RABV (intrusion loop up; B, E, H), and RSV (intrusion loop up; C, F, I) L proteins. Close up views of the ERDRP-0519 binding pocket in the different MeV L models are shown in (D-F). Steric incompatibilities (red scaffold substructures) are noted with RABV and RSV-based models (H-I) with intrusion loop in initiation conformation. (PDF) [file ppat.1009371.s014.pdf]

A

PIV-5 based

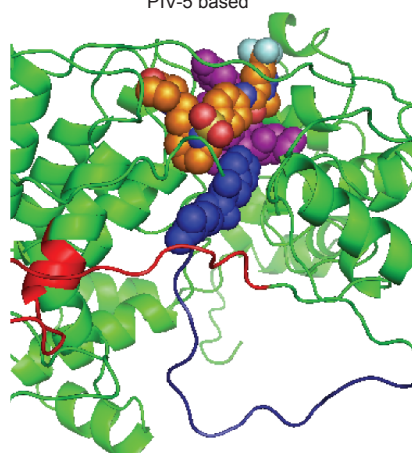

B

RABV based

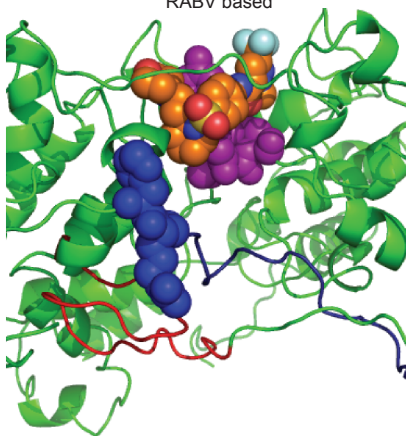

C

RSV based

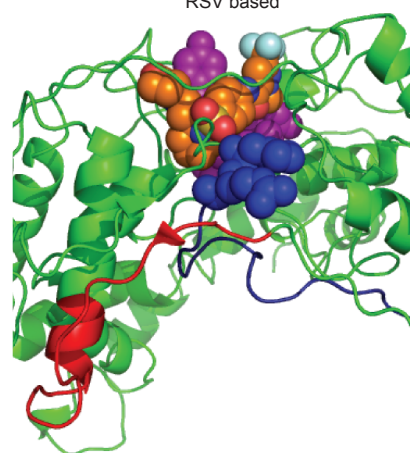

D

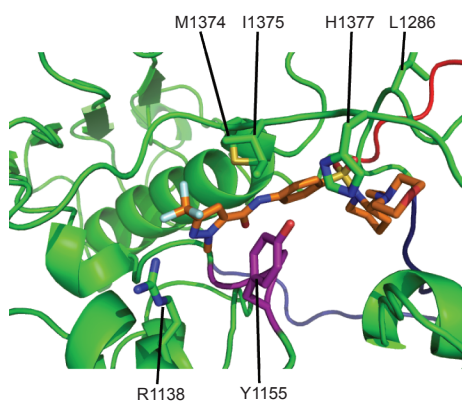

E

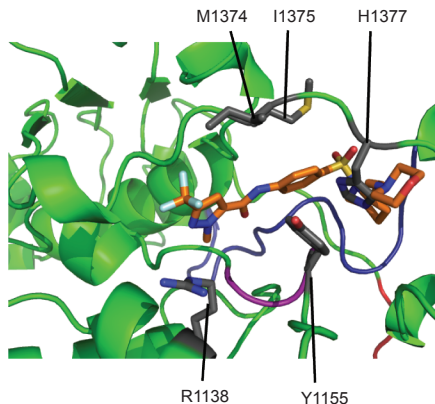

F

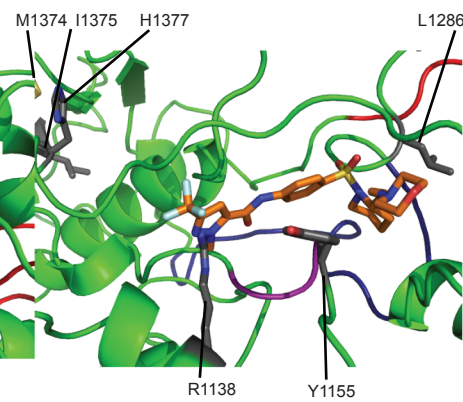

G

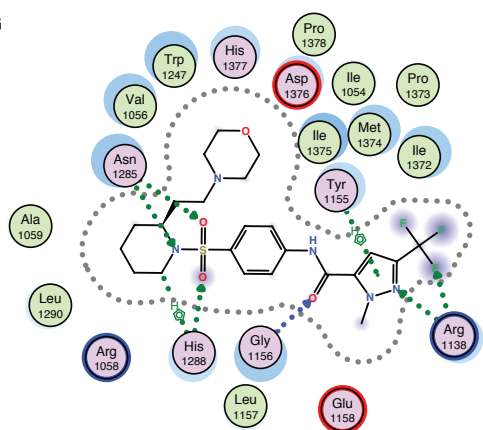

H

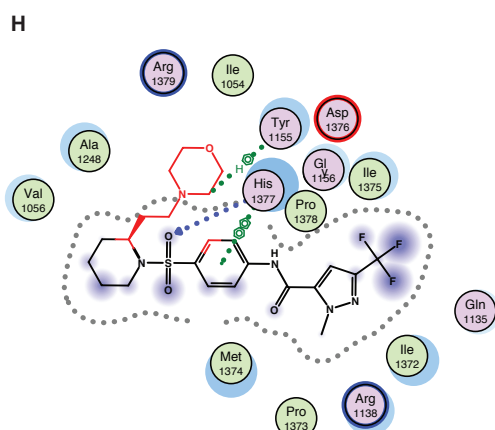

I

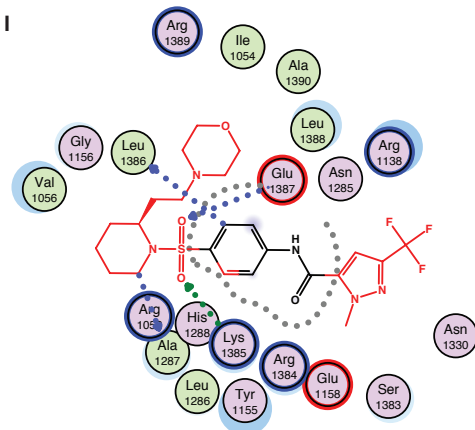

polar    sidechain acceptor    receptor exposure    proximity contour  
 acidic    sidechain donor    arene-arene    ligand exposure  
 basic    backbone acceptor    arene-H  
 greasy    backbone donor
